# Supplementary material for: Solid state structures and solution phase self-assembly of clicked mannosylated diketopiperazines
Source: Royal Society of Chemistry journal article supplement (doi:10.1039/c3ra42310g), 2013-01-01
Supplement: c3ra42310g.pdf [file c3ra42310g.pdf]

## Supporting Information

### **Solid state structure and solution phase self-assembly of clicked mannosylated diketopiperazines**

**Apurba Kr. Barman<sup>[a]</sup> and Sandeep Verma<sup>[a],[b]\*</sup>**

[a] Department of Chemistry, Indian Institute of Technology Kanpur, Kanpur-208016, (UP), India. Tel: +91-512-2597643 Fax: +91-512-2597436

[b] DST Unit of Excellence in Soft Nanofabrication, Indian Institute of Technology Kanpur  
E-mail: sverma@iitk.ac.in

#### **Table of contents:**

|                                                                                          |     |
|------------------------------------------------------------------------------------------|-----|
| 1. <sup>1</sup> H NMR and of <b>6a</b> in DMSO- <i>d</i> <sub>6</sub>                    | S2  |
| 2. <sup>13</sup> C NMR spectra of <b>6a</b>                                              | S3  |
| 3. <sup>1</sup> H- <sup>1</sup> H COSY NMR spectra of <b>6a</b>                          | S4  |
| 2. ESI-HRMS of <b>6a</b>                                                                 | S5  |
| 3. <sup>1</sup> H and <sup>13</sup> C NMR spectra of <b>6b</b>                           | S6  |
| 4. ESI-HRMS of <b>6b</b>                                                                 | S7  |
| 5. <sup>1</sup> H and <sup>13</sup> C NMR spectra of <b>7a</b>                           | S8  |
| 6. ESI-HRMS of <b>7a</b>                                                                 | S9  |
| 7. <sup>1</sup> H and <sup>13</sup> C NMR spectra of <b>7b</b>                           | S10 |
| 8. ESI-HRMS of <b>7b</b>                                                                 | S11 |
| 9. <sup>1</sup> H and <sup>13</sup> C NMR spectra of <b>8a</b>                           | S12 |
| 10. ESI-HRMS of <b>8a</b>                                                                | S13 |
| 11. <sup>1</sup> H and <sup>13</sup> C NMR spectra of <b>8b</b>                          | S14 |
| 12. ESI-HRMS of <b>8a</b>                                                                | S15 |
| 13. <sup>1</sup> H and <sup>13</sup> C NMR spectra of <b>10</b>                          | S16 |
| 14. ESI-HRMS of <b>10</b>                                                                | S17 |
| 15. Figure S1: <sup>1</sup> H NMR of <b>6a</b> and <b>8a</b> in varying amounts of water | S18 |
| 16. Figure S2: SEM images of <b>8b</b> and <b>10</b>                                     | S19 |

17. X-ray structures of **6a** and **8a** S19
18. Table S1: Crystal structure refinement parameters for **6a** and **8a** S20
19. Table S2: H-bonding in **6a** and **8a** S21

<sup>1</sup>H NMR spectra of **6a** (DMSO-*d*<sub>6</sub>):

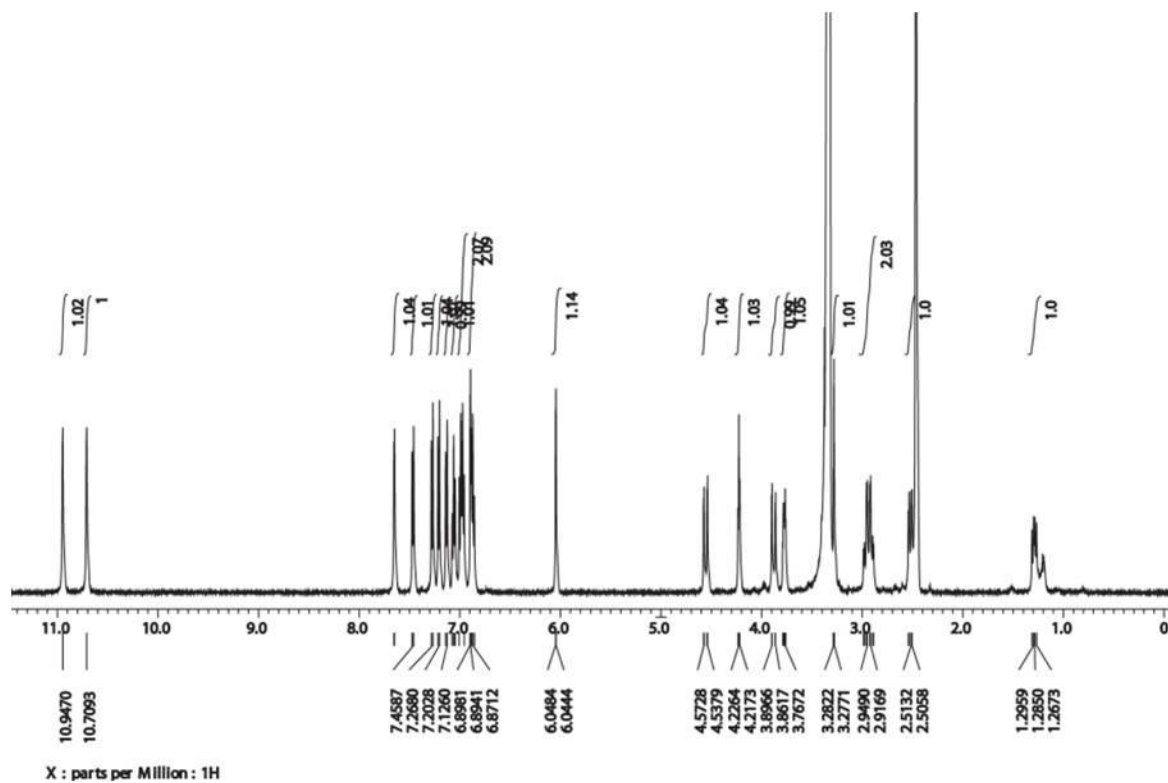

$^{13}\text{C}$  NMR spectra of **6a**:

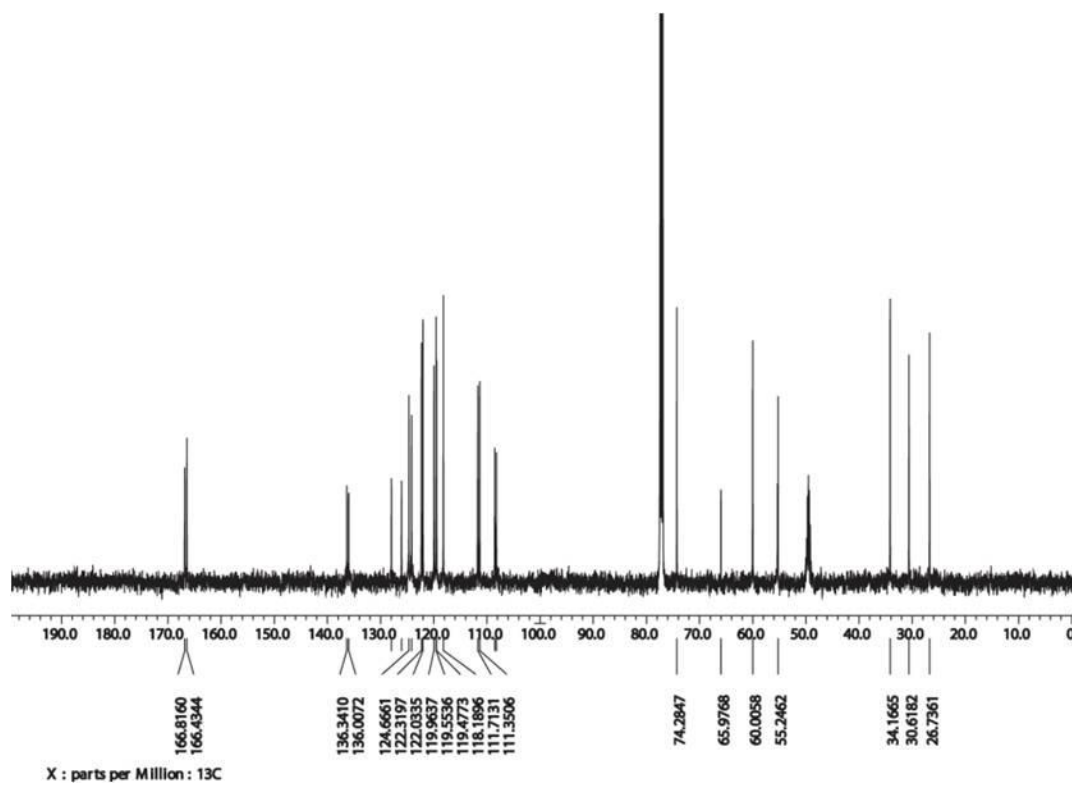

$^1\text{H}$ - $^1\text{H}$  COSY NMR spectra of **6a** (DMSO- $d_6$ )

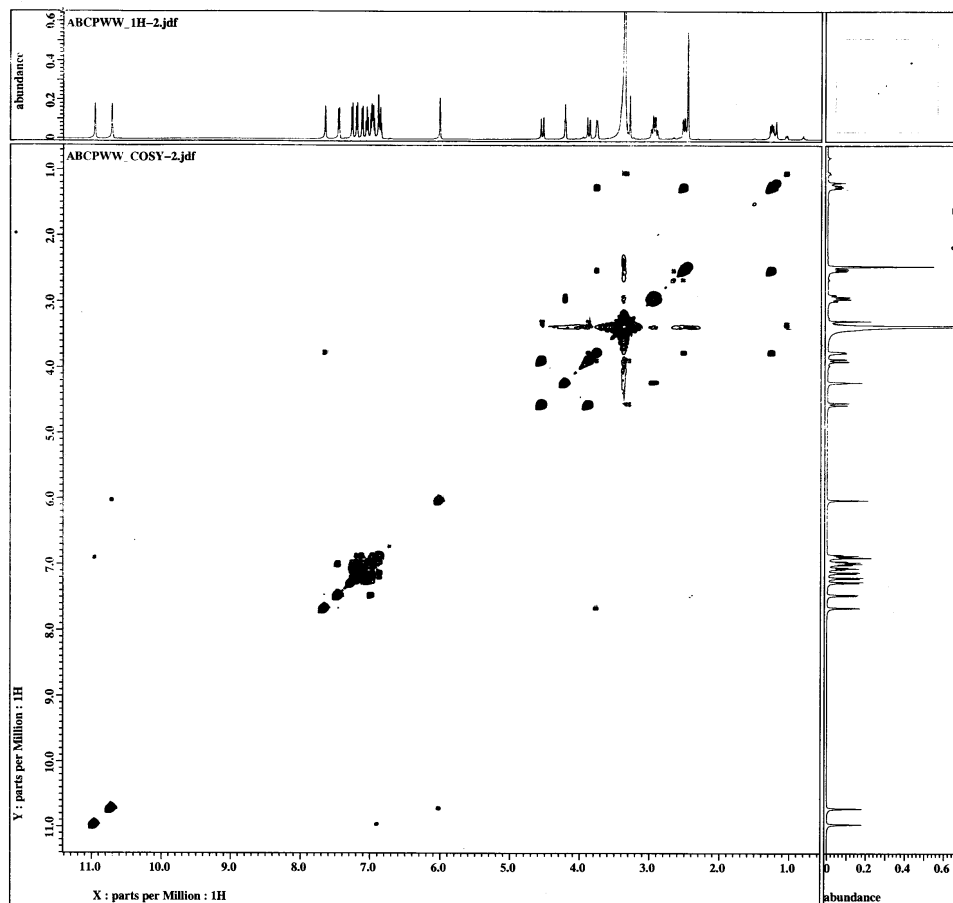

### ESI-HRMS of 6a:

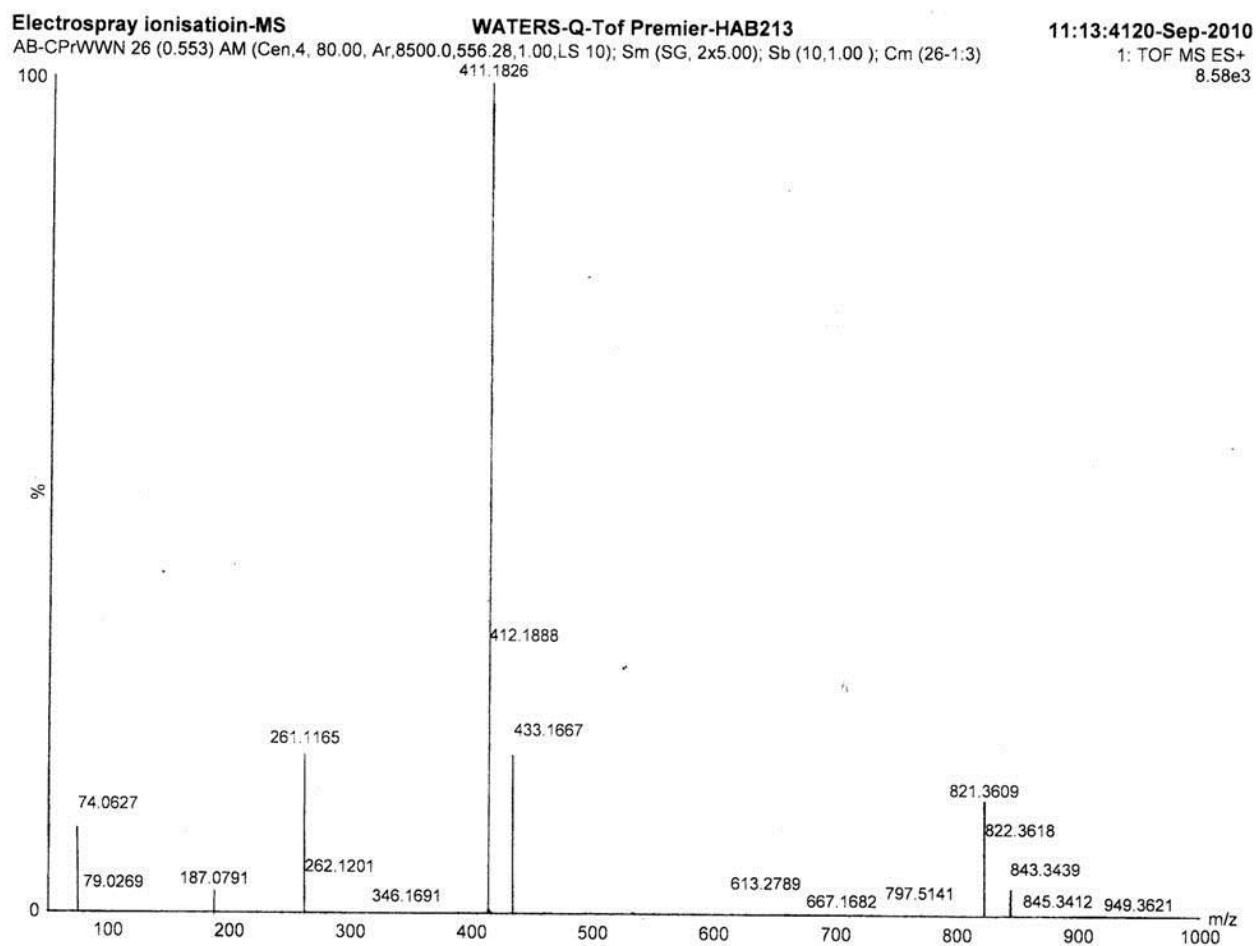

$^1\text{H}$  and  $^{13}\text{C}$  NMR spectra of **6b**:

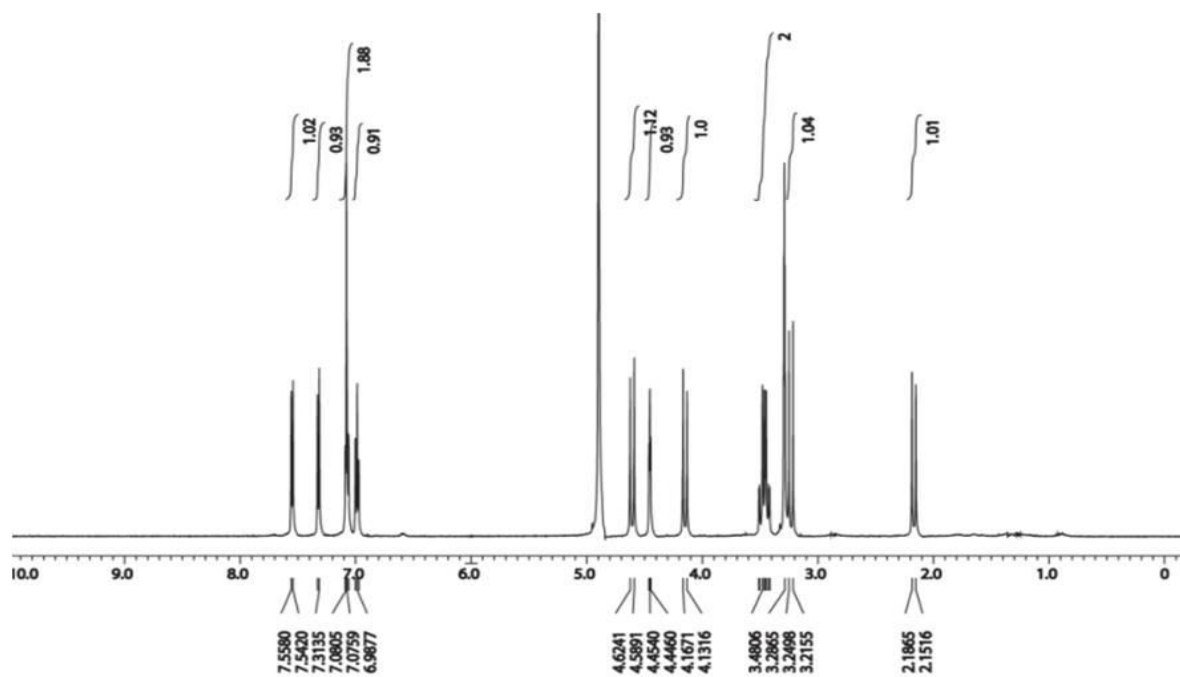

X : parts per Million : 1H

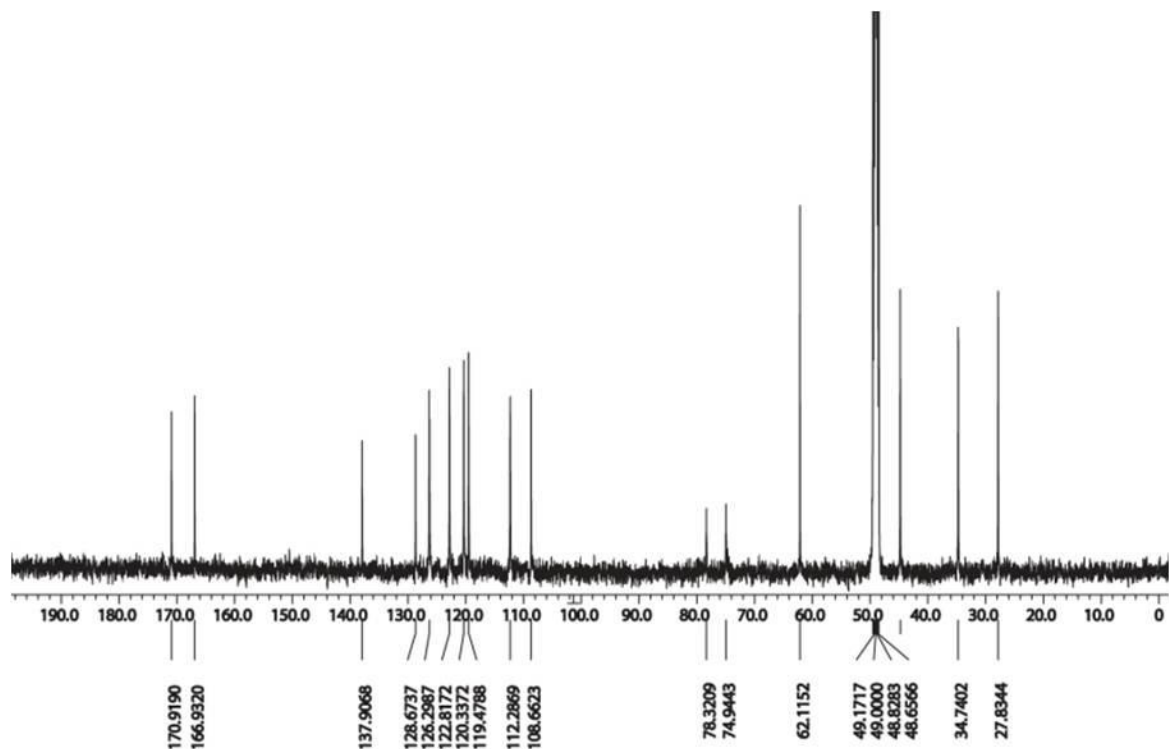

X : parts per Million : 13C

### ESI-HRMS of **6b**:

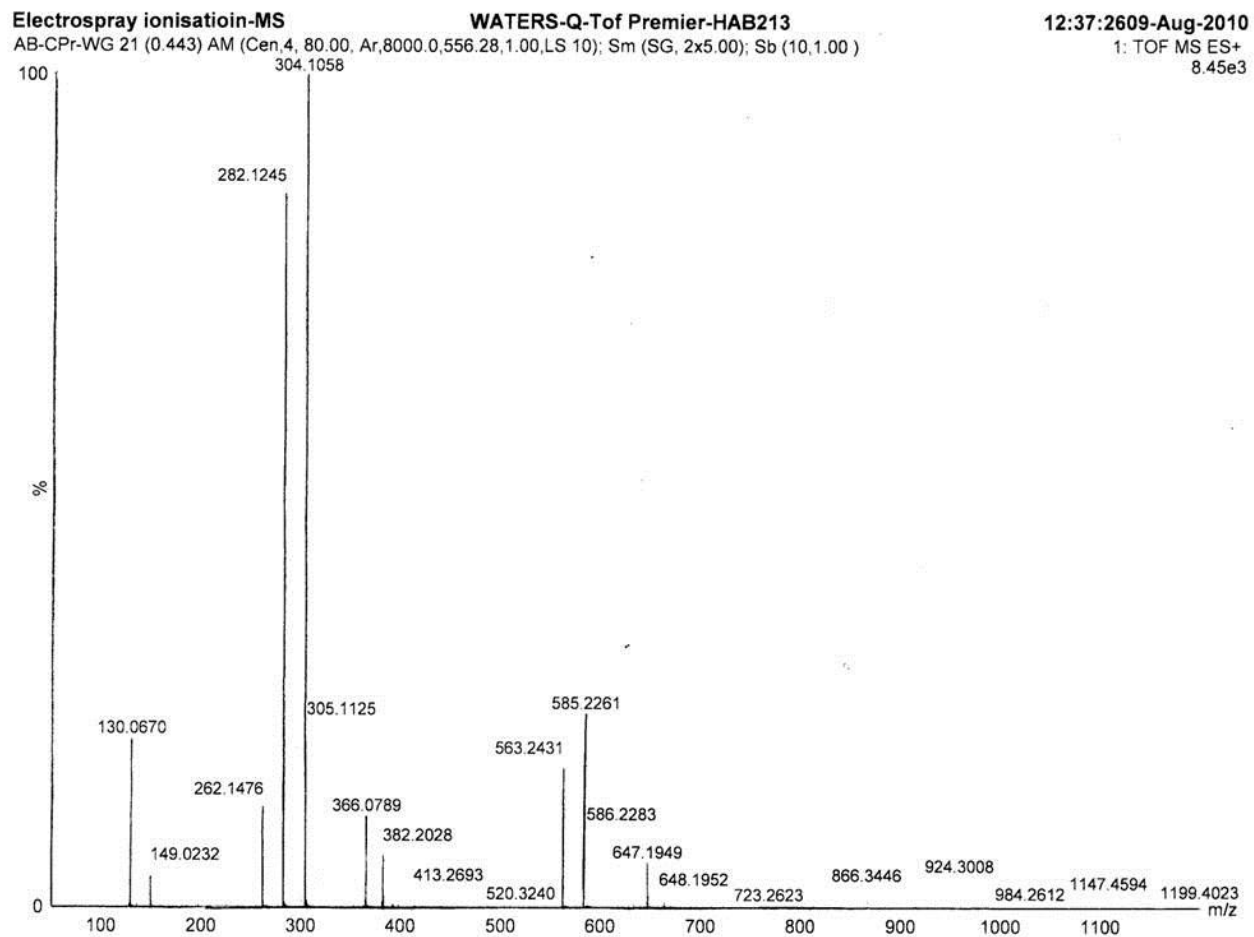

$^1\text{H}$  and  $^{13}\text{C}$  NMR spectra of **7a**:

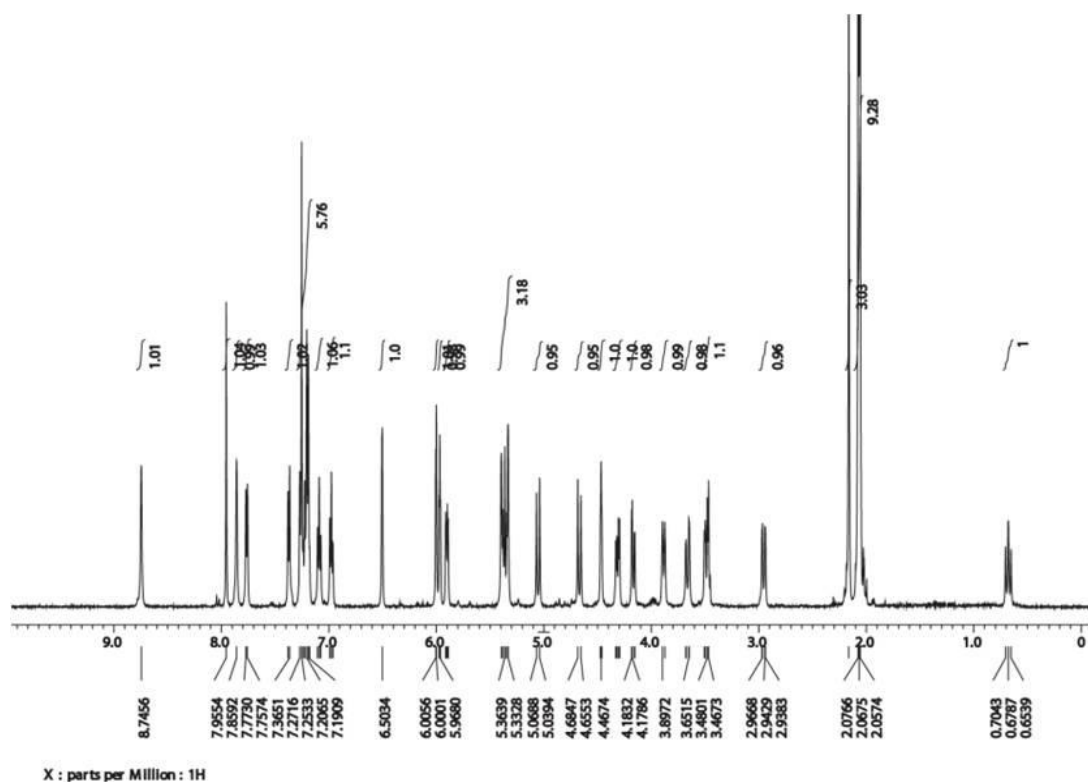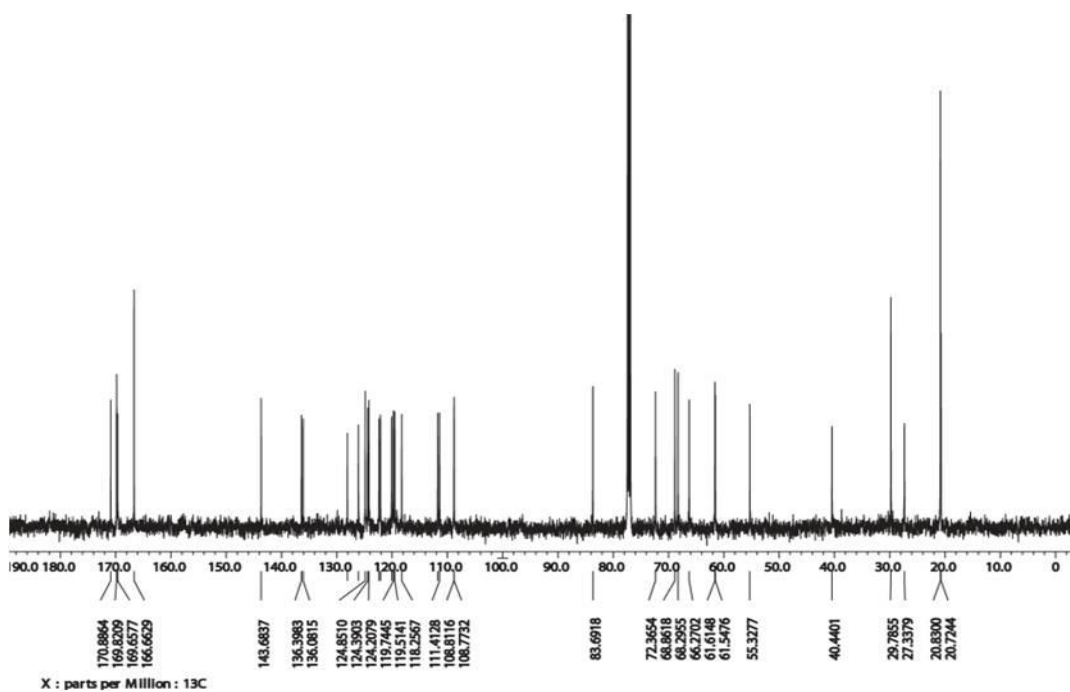

ESI-



### ESI-HRMS of 7a:

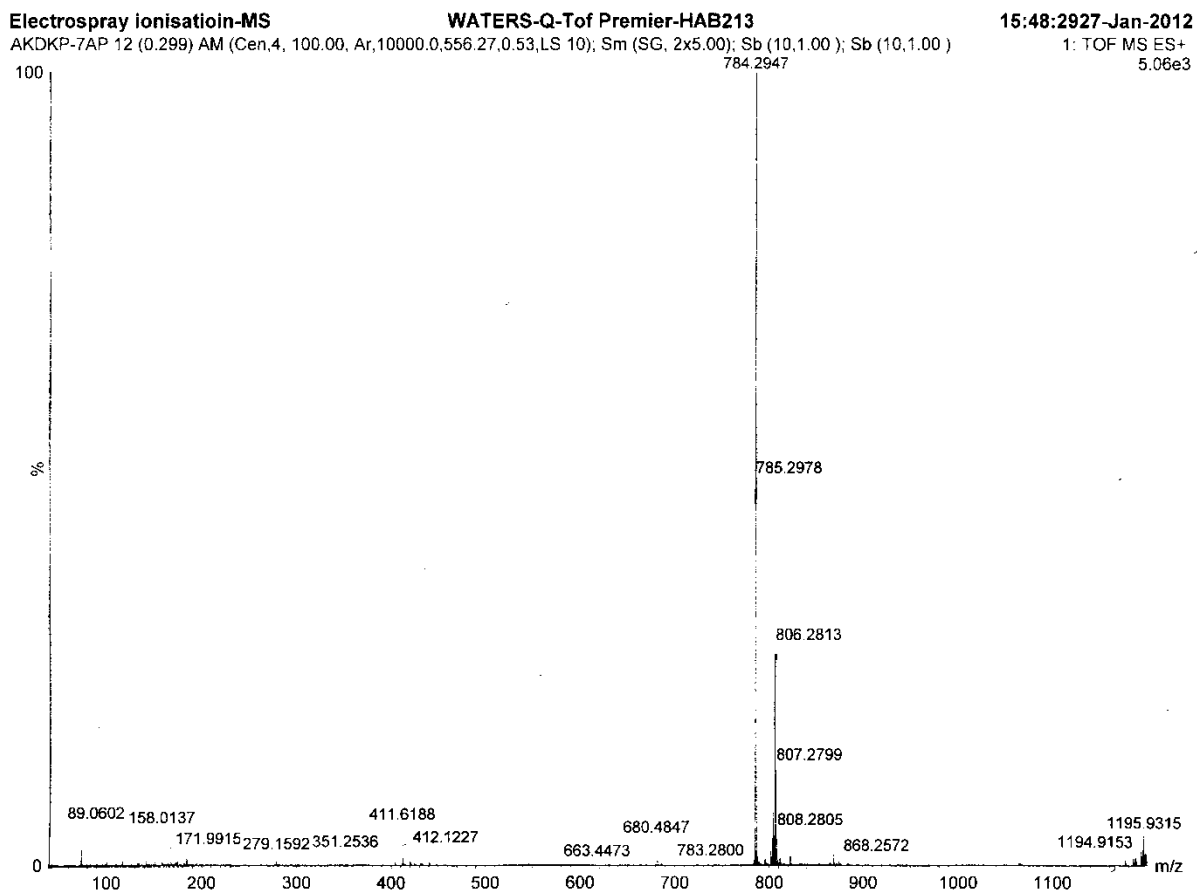

# $^1\text{H}$ and $^{13}\text{C}$ NMR spectra of **7b**:

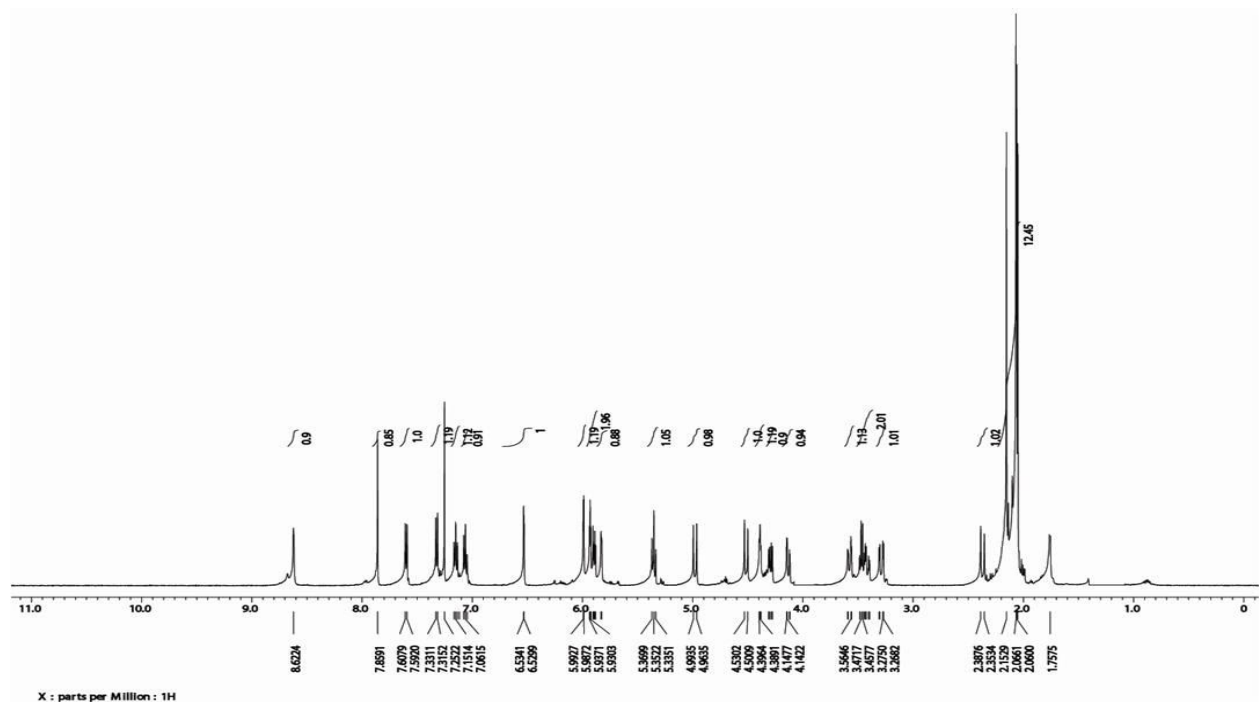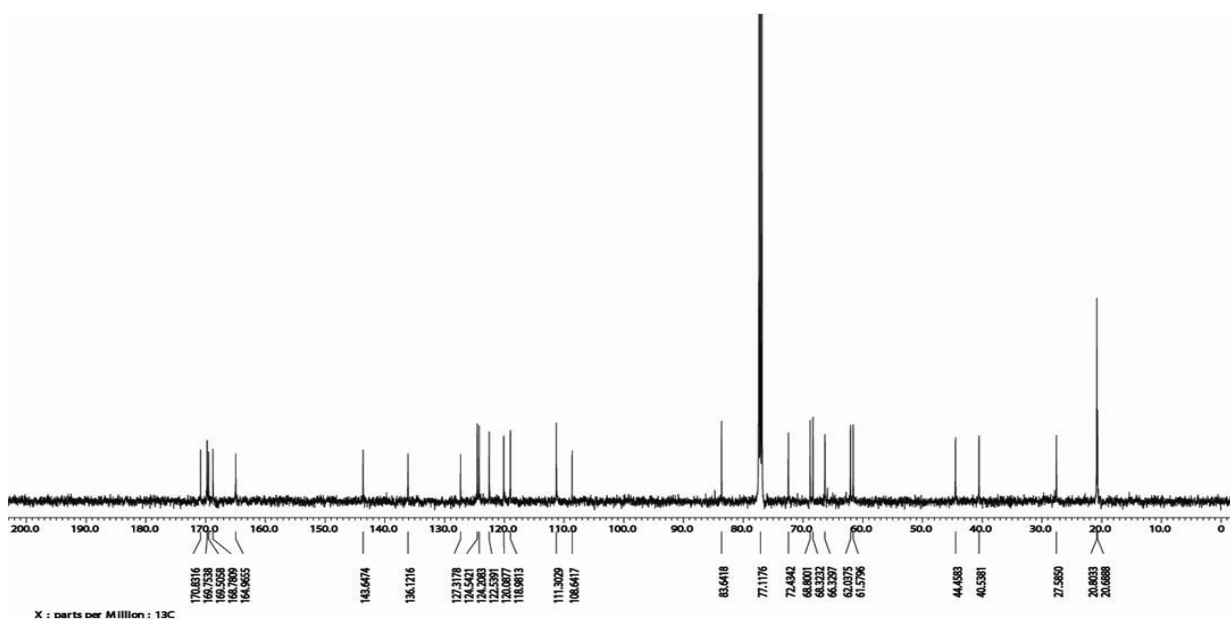

### ESI-HRMS of 7b:

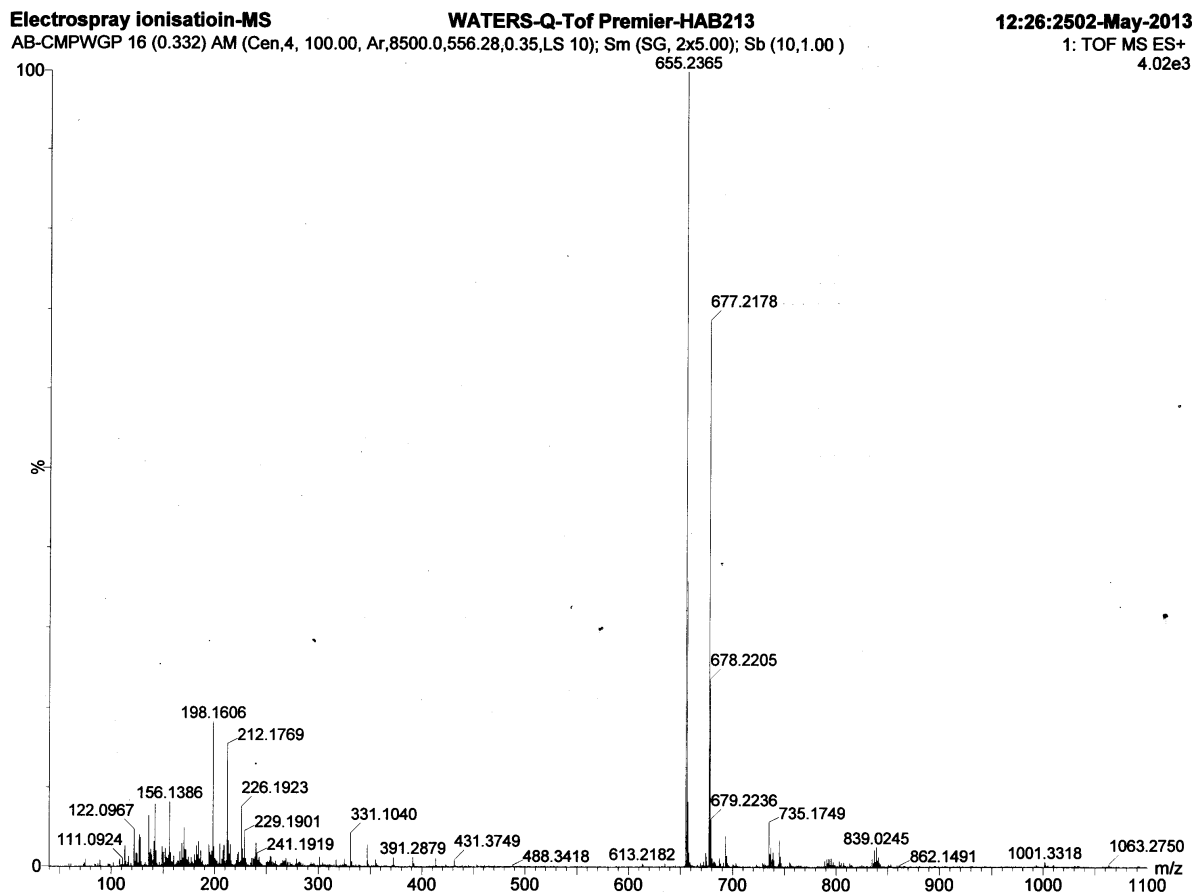

$^1\text{H}$  and  $^{13}\text{C}$  NMR spectra of **8a**:

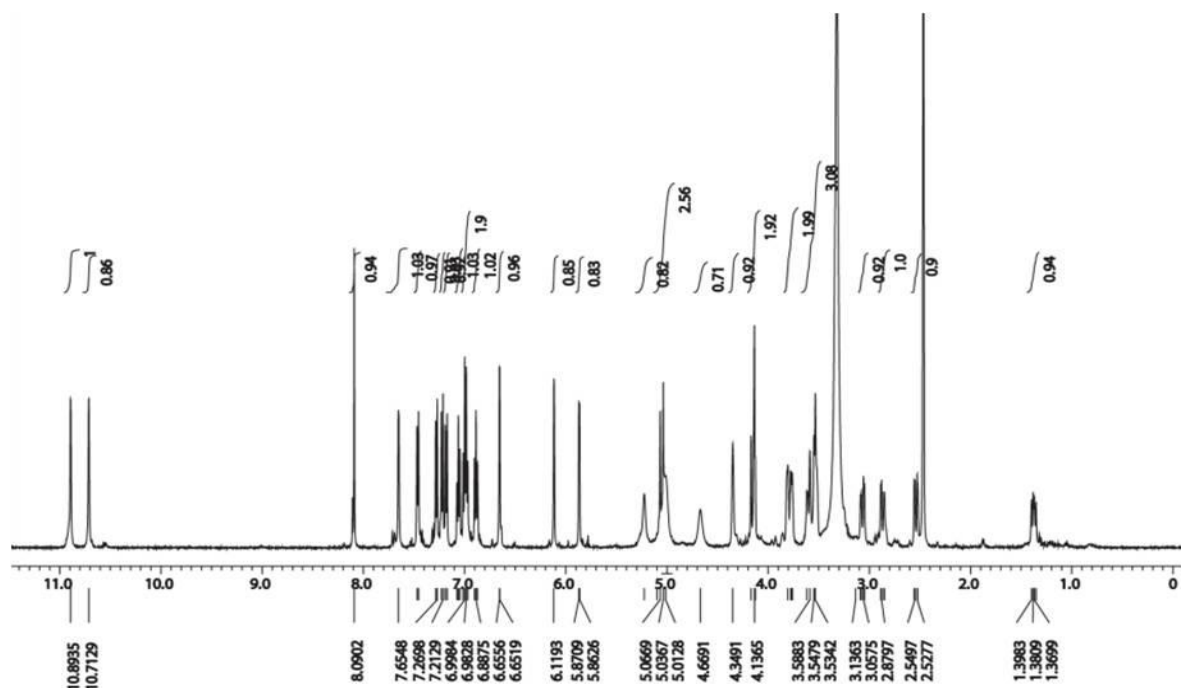

X : parts per Million :  $^1\text{H}$

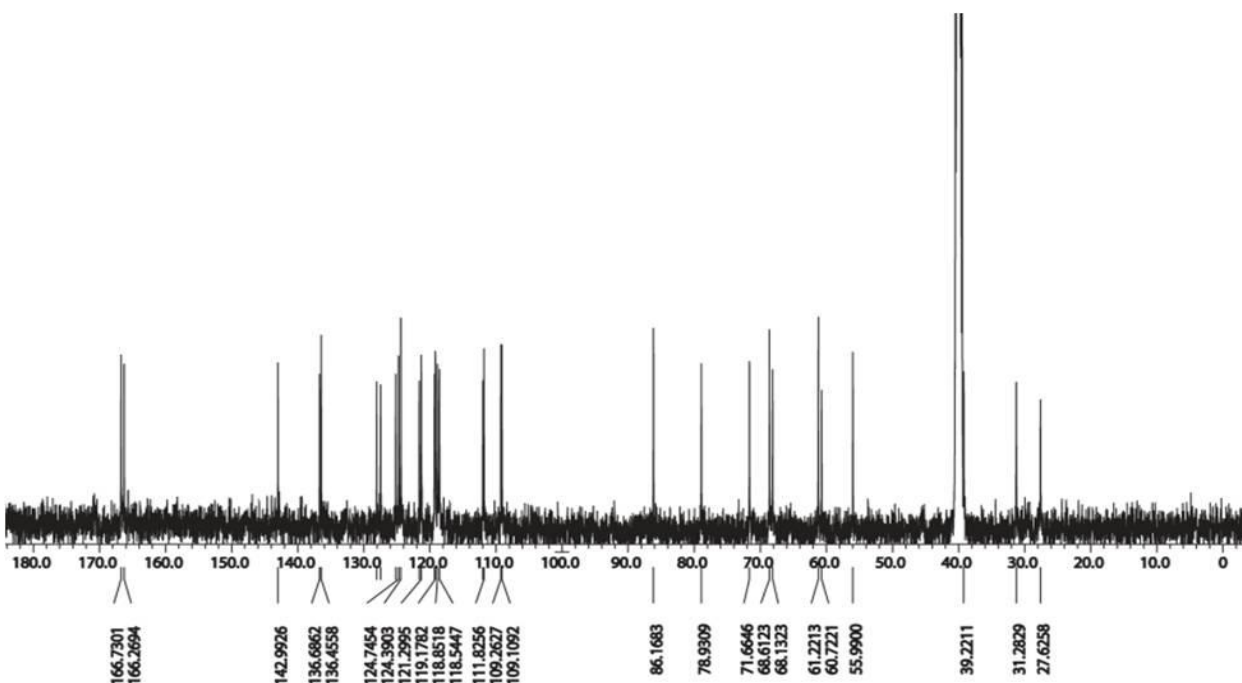

X : parts per Million :  $^{13}\text{C}$

### ESI-HRMS of 8a:

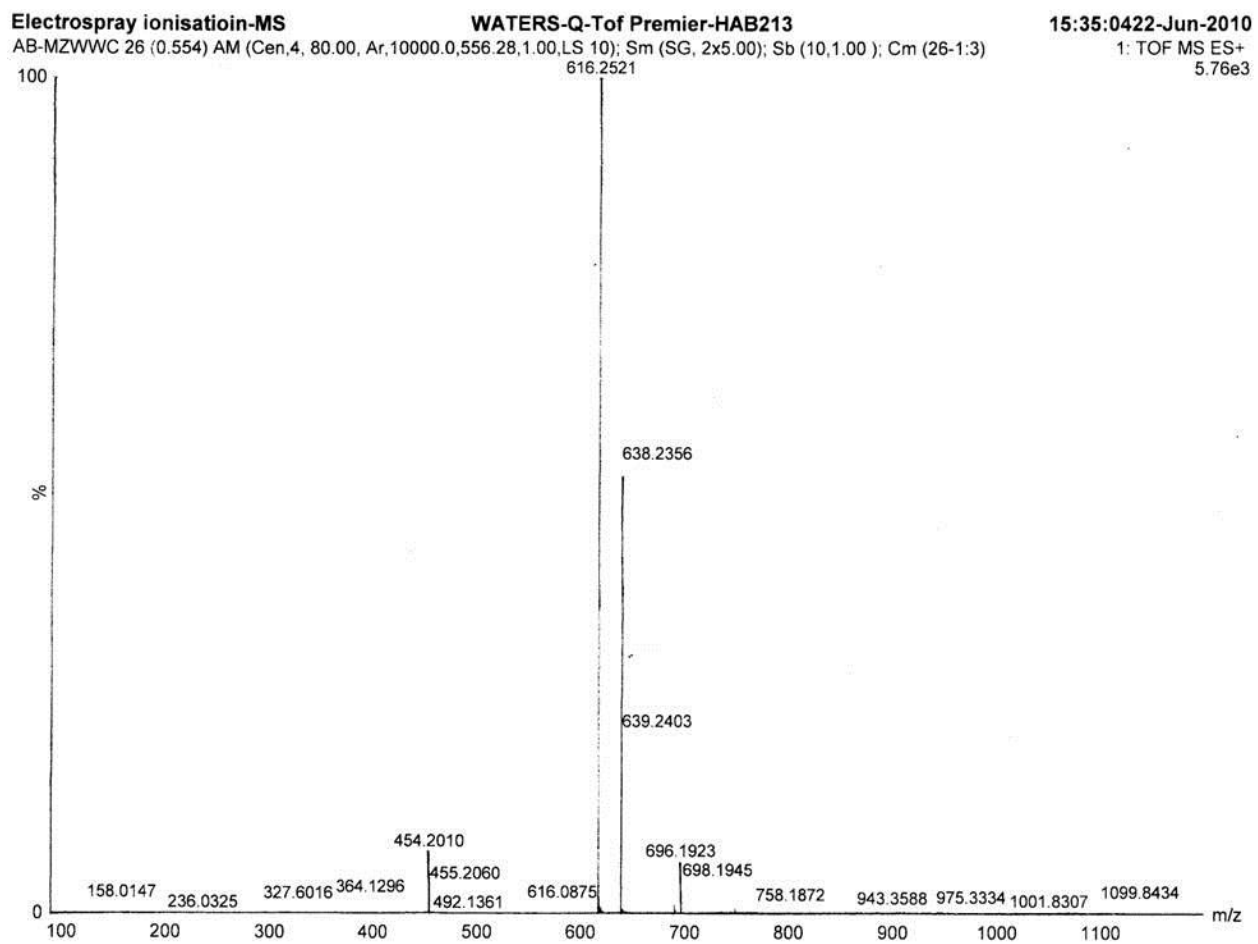

$^1\text{H}$  and  $^{13}\text{C}$  NMR spectra of **8b**:

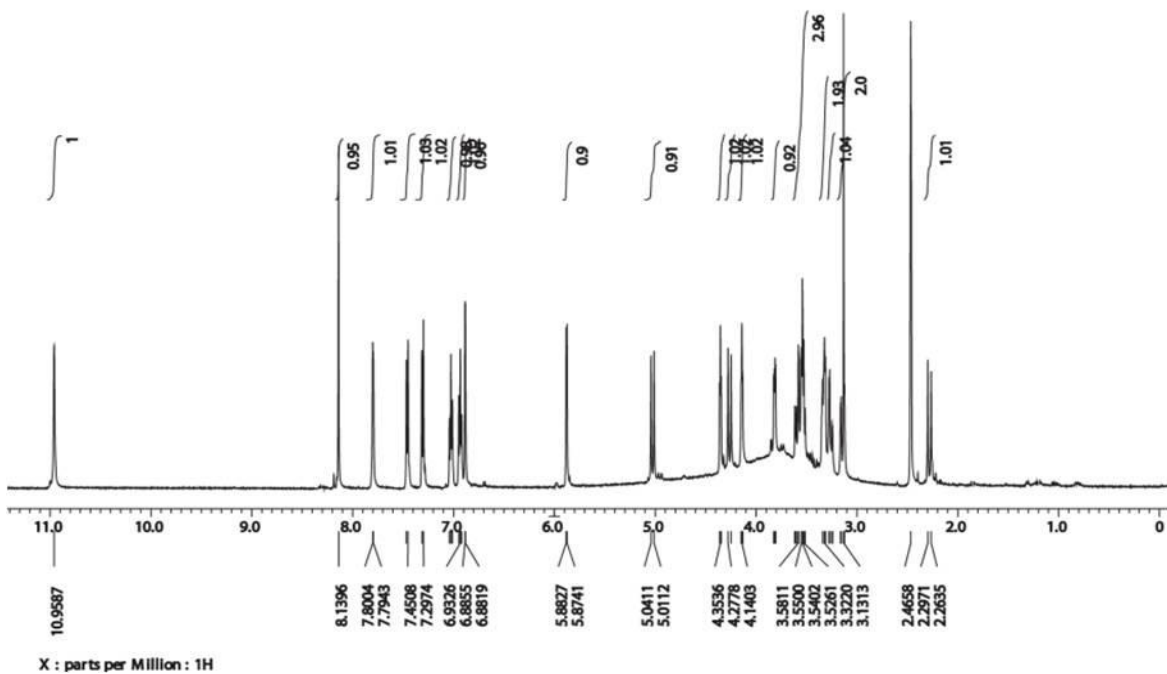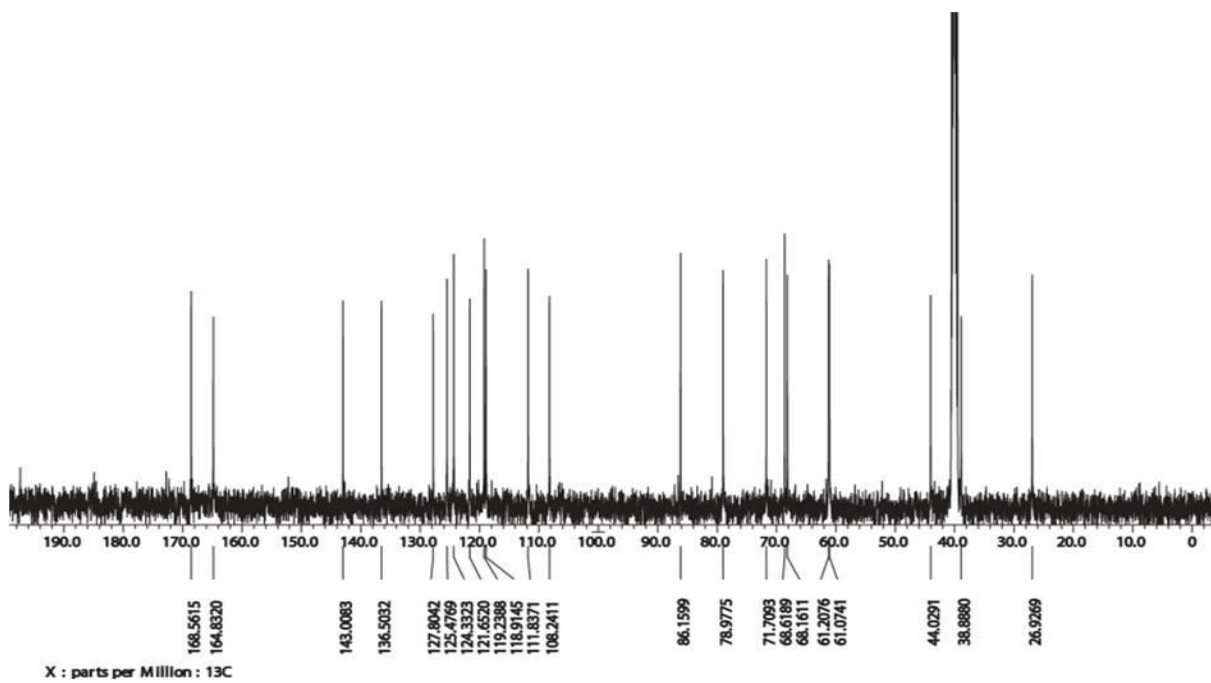

### ESI-HRMS of **8b**:

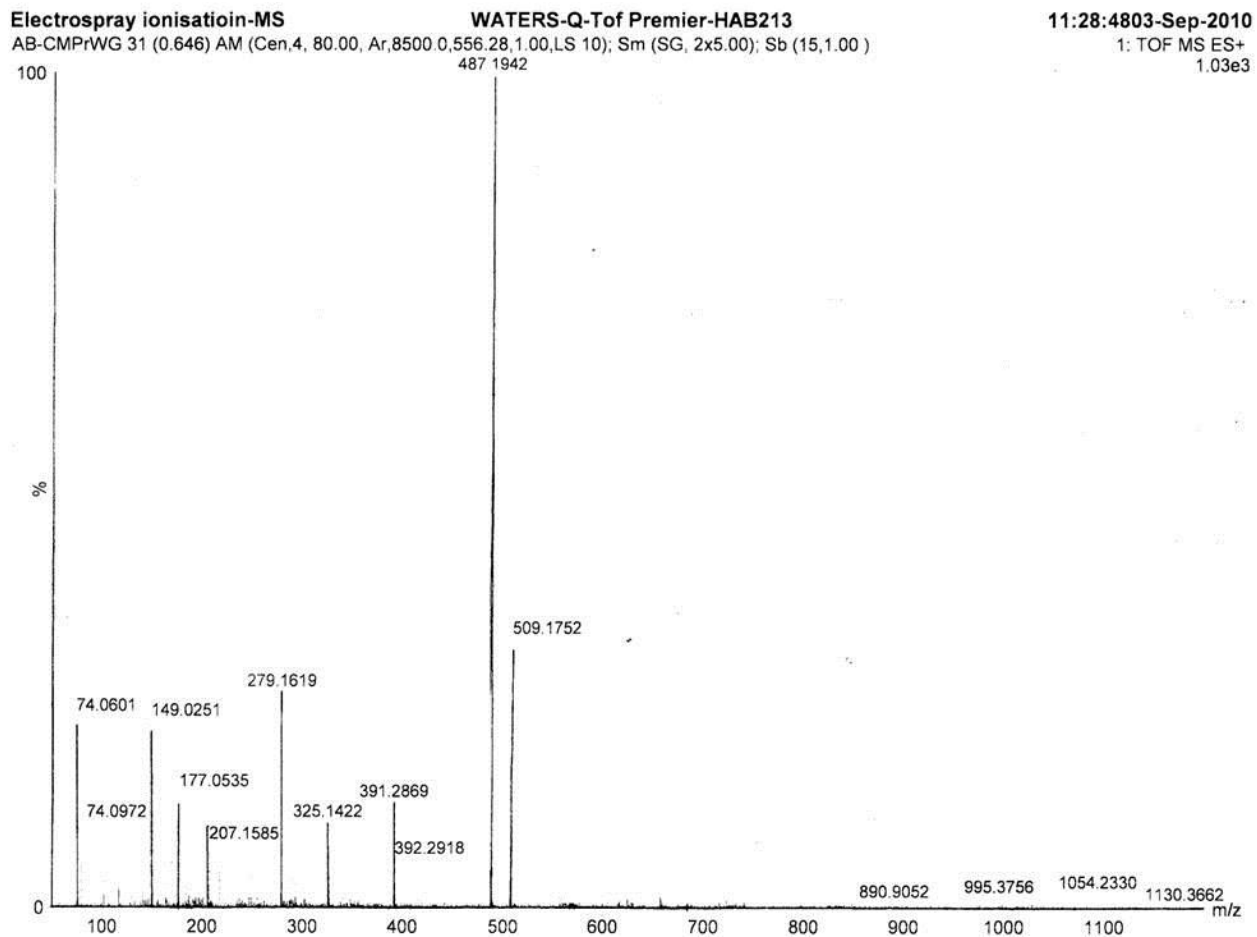

$^1\text{H}$  and  $^{13}\text{C}$  NMR spectra of **10**:

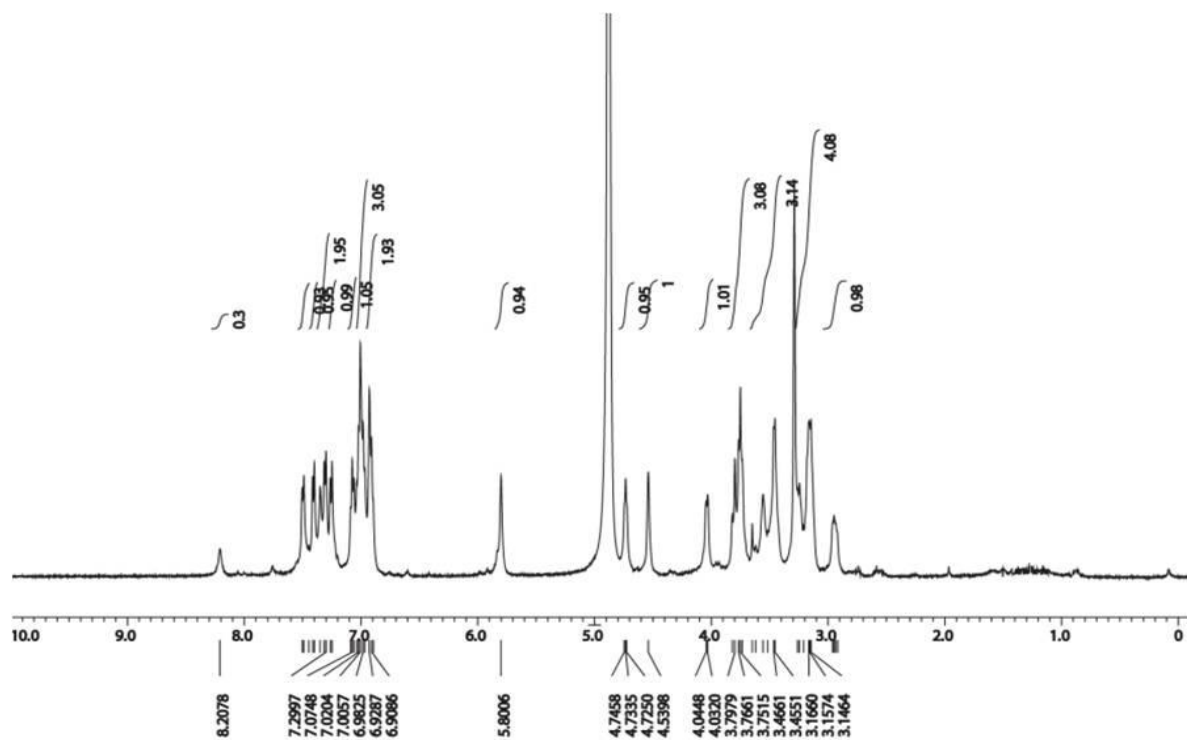

X : parts per Million : 1H

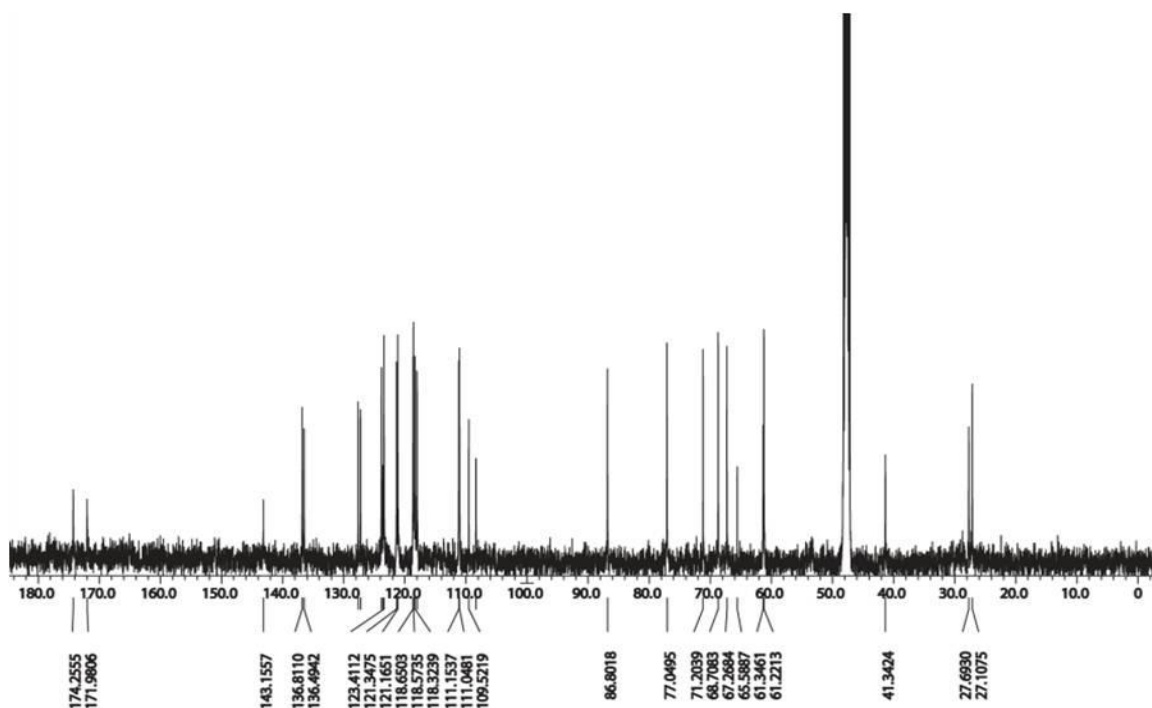

X : parts per Million : 13C



### ESI-HRMS of 10:

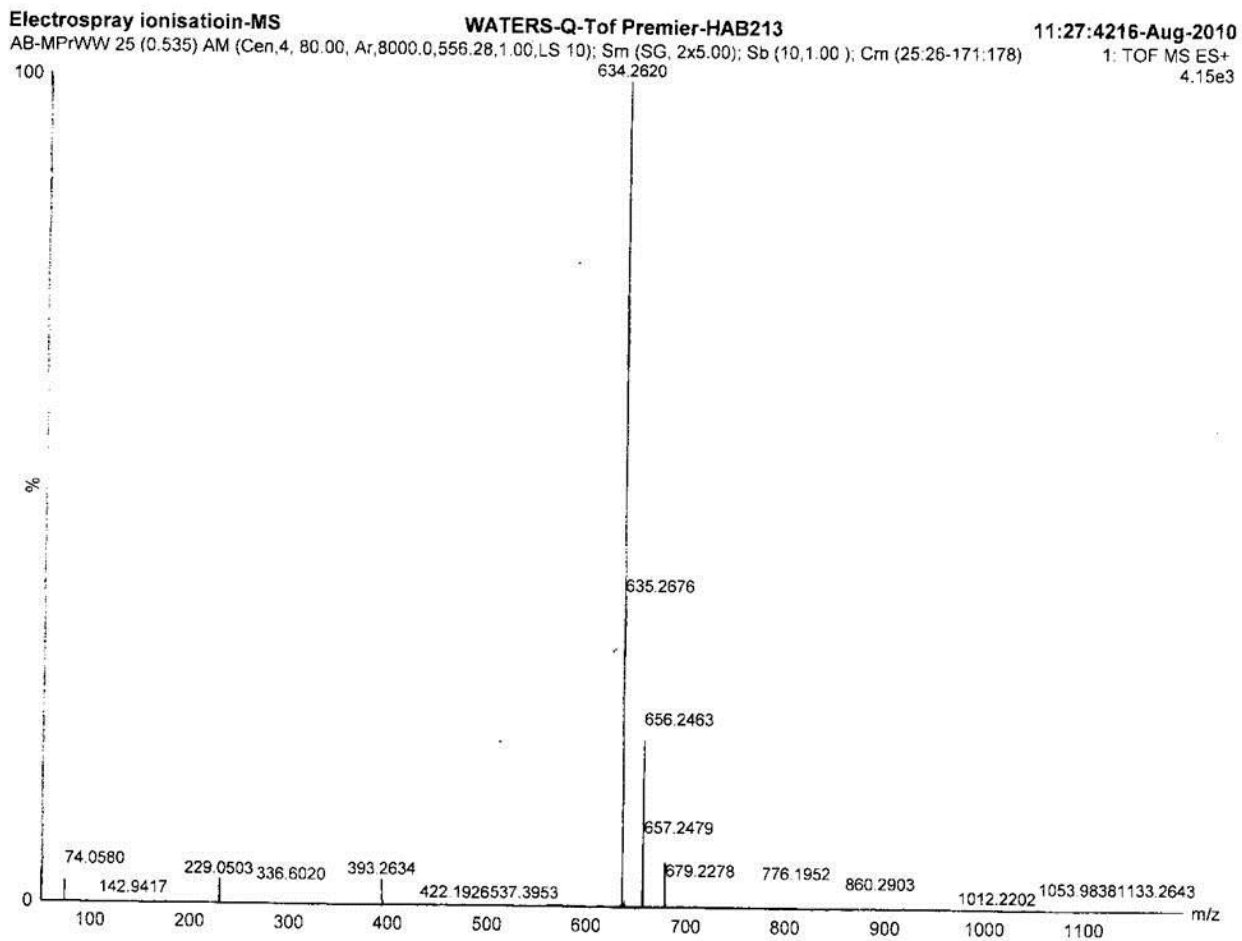

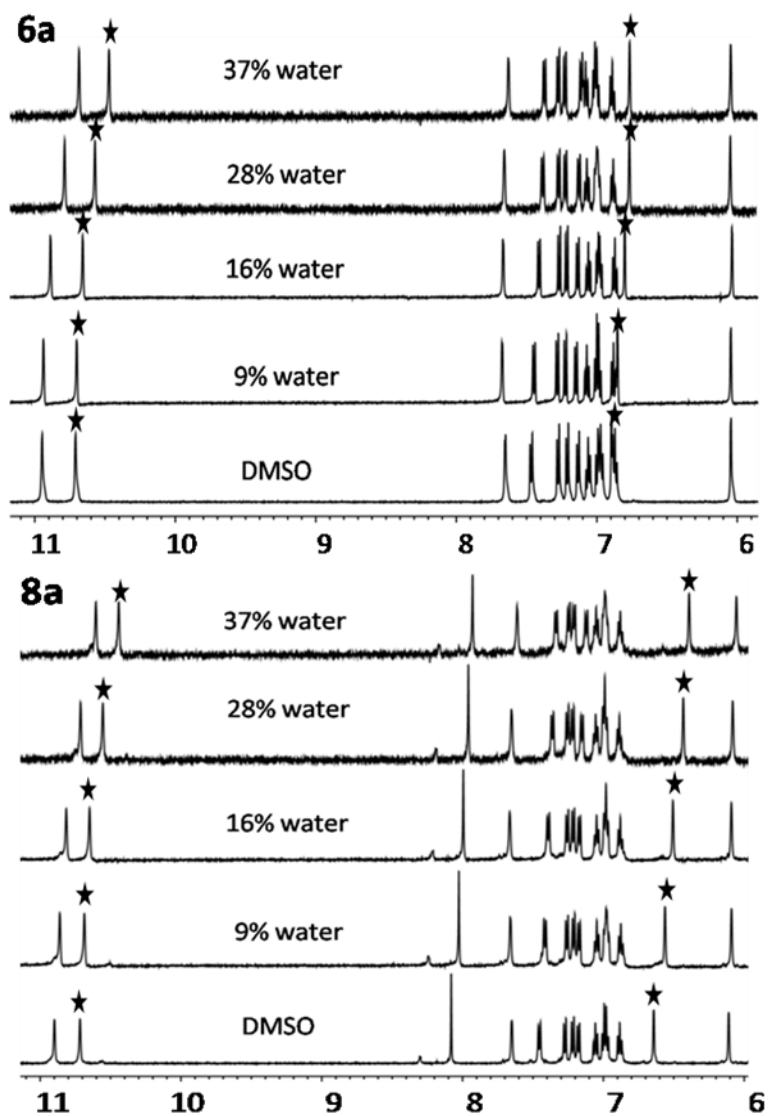

**Figure S1:** <sup>1</sup>H NMR of **6a** and **8a** in varying amounts of water (aromatic region). Concentration of **6a** and **8a** was  $2.0 \times 10^{-2}$  M.

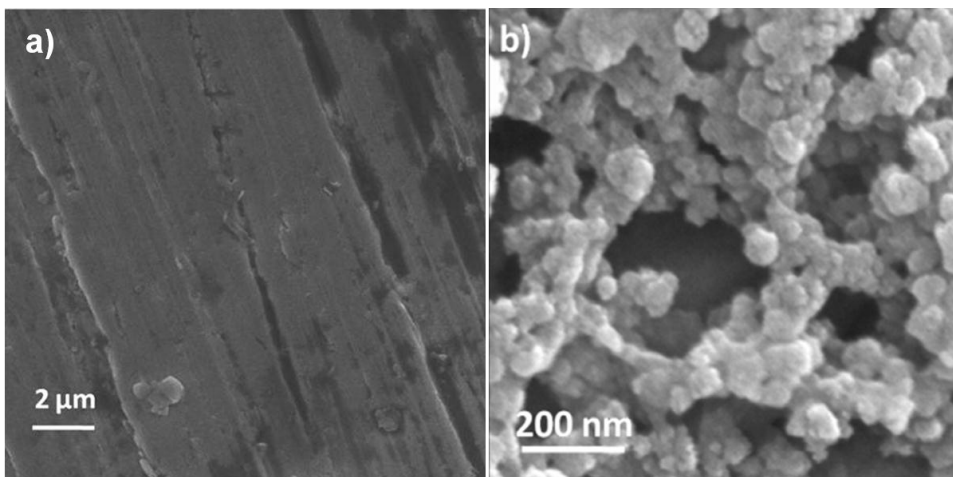

**Figure S2:** SEM images of a) **8b** & b) **10** in 50% aqueous methanol (2 mM) after 24 h ageing.

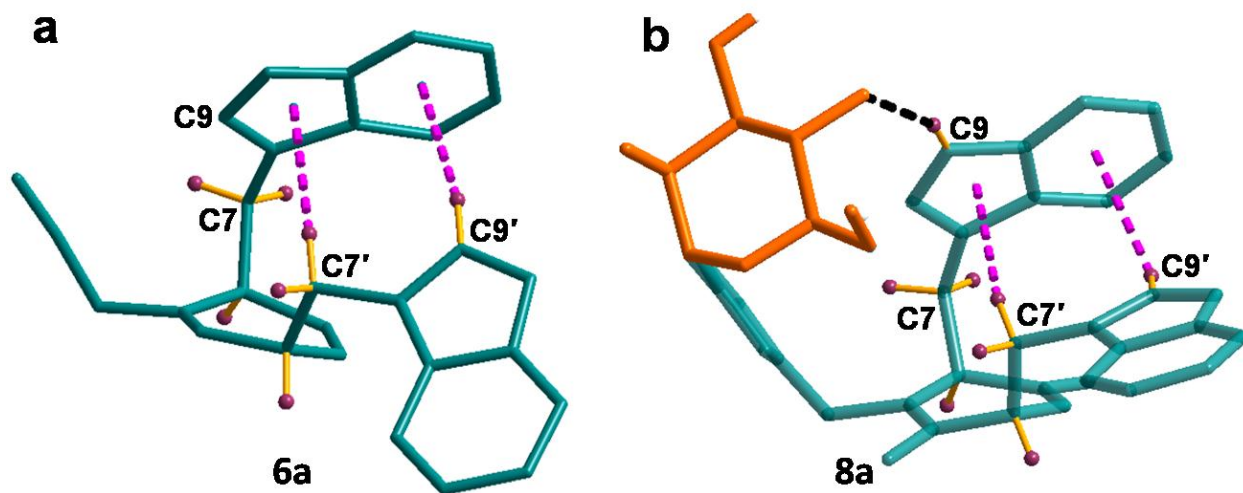

**Figure S3:** Crystal structures of a) **6a** and b) **8a** showing relationship of  $-\text{CH}_2$   $\beta$  hydrogens of Trp with vicinal hydrogens ( $-\text{CH}$   $\alpha$  hydrogens). Trans relationship could be seen for C7'H engaged in CH- $\pi$  bond with the respective vicinal hydrogens.

**Table S1.** Crystal structure refinement parameters for **6a** and **8a**.

| Identification code                                    | Compound 8a                                                         | Compound 6a                                                         |
|--------------------------------------------------------|---------------------------------------------------------------------|---------------------------------------------------------------------|
| Empirical formula                                      | C <sub>32</sub> H <sub>33</sub> N <sub>7</sub> O <sub>9</sub>       | C <sub>25</sub> H <sub>22</sub> N <sub>4</sub> O <sub>2</sub>       |
| <i>Mr</i>                                              | 659.65                                                              | 410.47                                                              |
| crystal system                                         | orthorhombic                                                        | tetragonal                                                          |
| space group                                            | <i>P</i> 21 21 21                                                   | <i>P</i> 43                                                         |
| <i>a</i> /Å                                            | 8.505 (2)                                                           | 19.7959(19)                                                         |
| <i>b</i> /Å                                            | 8.030(5)                                                            | 19.7959(19)                                                         |
| <i>c</i> /Å                                            | 24.601(5)                                                           | 11.155(2)                                                           |
| $\alpha$ /°                                            | 90.000                                                              | 90                                                                  |
| $\beta$ /°                                             | 90.000                                                              | 90                                                                  |
| $\gamma$ /°                                            | 90.000                                                              | 90                                                                  |
| Volume/ Å <sup>3</sup>                                 | 2957.9                                                              | 4371.4(11)                                                          |
| <i>Z</i>                                               | 4                                                                   | 8                                                                   |
| <i>D<sub>x</sub></i> /Mg m <sup>-3</sup>               | 1.481                                                               | 1.247                                                               |
| <i>F</i> (000)                                         | 1384                                                                | 1728                                                                |
| $\mu$ / mm <sup>-1</sup>                               | 1.481                                                               | 0.081                                                               |
| $\theta$ range for data collection/ °                  | 2.19 - 28.36                                                        | 2.30 - 26.00                                                        |
| Limiting indices                                       | -10 → <i>h</i> → 11,<br>-18 → <i>k</i> → 10,<br>-32 → <i>l</i> → 32 | -24 → <i>h</i> → 23,<br>-24 → <i>k</i> → 21,<br>-13 → <i>l</i> → 13 |
| Reflections collected                                  | 19274                                                               | 24249                                                               |
| unique reflections                                     | 7246                                                                | 8484                                                                |
| R(int)                                                 | 0.0521                                                              | 0.0652                                                              |
| Completeness to $\theta$                               | 28.36, 98.9                                                         | 26.00, 99.2                                                         |
| <i>T</i> <sub>max</sub> / <i>T</i> <sub>min</sub>      | 0.9912/0.9782                                                       | 0.9903/0.9839                                                       |
| Data / restraints / parameters                         | 7246 / 1 / 441                                                      | 8484 / 1 / 559                                                      |
| Goodness-of-fit on <i>F</i> <sup>2</sup>               | 1.086                                                               | 1.001                                                               |
| <i>R</i> 1 and <i>R</i> 2 [ <i>I</i> > 2σ( <i>I</i> )] | 0.0638, 0.1573                                                      | 0.0553, 0.1149                                                      |
| <i>R</i> 1 and <i>R</i> 2 (all data)                   | 0.0891, 0.1822                                                      | 0.0745, 0.1237                                                      |
| Absolute structure parameter                           | -1.5(14)                                                            | 0.2(11)                                                             |
| Largest diff. peak and hole/e.Å <sup>-3</sup>          | 0.537 and -0.534                                                    | 0.217 and -0.191                                                    |
| CCDC No.                                               | 864568                                                              | 864569                                                              |

**Table S2.** H-bonding of **6a** and **8a** in crystal structure.

| D—H...A <sup>a</sup>           | H...A   | D...A    | D—H...A |
|--------------------------------|---------|----------|---------|
| <b>Compound 8a</b>             |         |          |         |
| O4...H4'...O5                  | 2.43    | 2.754(3) | 105     |
| O4...H4'...N8 <sup>ii</sup>    | 2.10    | 2.887(4) | 160     |
| O5...H5'...O6                  | 2.54    | 2.867(4) | 105     |
| O5...H5'...O1 <sup>ii</sup>    | 2.09    | 2.869(3) | 159     |
| O6...H6'...O5                  | 2.56    | 2.867(4) | 104     |
| O6...H6'...O1W <sup>ii</sup>   | 2.57    | 2.980(4) | 112     |
| O7...H7'...O1W <sup>iii</sup>  | 1.96    | 2.770(4) | 169     |
| N8...H8'...O6                  | 2.17(4) | 2.911(4) | 157(4)  |
| N8'...H8'...O4 <sup>iv</sup>   | 2.03    | 2.887(4) | 174     |
| C3...H3...O5 <sup>v</sup>      | 2.58    | 3.355(4) | 136     |
| C7...H7A...O1A <sup>ii</sup>   | 2.50    | 3.367(7) | 148     |
| C12...H12...O1A <sup>iv</sup>  | 2.41    | 3.178(8) | 140     |
| C13'...H13'...N8 <sup>vi</sup> | 2.62    | 3.516(5) | 161     |
| C19...H19...O                  | 2.35    | 2.902(4) | 118     |
| C26...H26...O1A                | 2.54    | 3.430(8) | 150     |
| C27...H27...N20                | 2.54    | 2.897(4) | 101     |
| <b>Compound 6a</b>             |         |          |         |
| N4...H4...N8B <sup>vii</sup>   | 2.41    | 3.061(3) | 133     |
| N4A...H4A...O2 <sup>viii</sup> | 2.44    | 3.282(3) | 165     |
| N8...H8...O1A                  | 1.99    | 2.837(3) | 167     |
| N8A...H8A...O1                 | 2.00    | 2.812(3) | 158     |
| C17...H17A...O1A <sup>ix</sup> | 2.24    | 3.002(4) | 135     |
| C17A...H17D...O2 <sup>x</sup>  | 2.29    | 3.198(4) | 156     |

<sup>a</sup>**Symmetry of A:** (i) 1/2-x, 1-y, -1/2+z (ii) 1-x, 1/2+y, 1/2-z (iii) -1+x, y, z (iv) 1/2-x, 1-y, 1/2+z (v) 1-x, -1/2+y, 1/2-z (vi) -1/2+x, 1/2-y, 1-z (vii) y, -x, 1/4+z (viii) -y, x, -1/4+z (ix) 1-y, x, -1/4+z (x) y, 1-x, -3/4+z, where A= acceptor and D=donor
